# Supplementary material
Source: PubMed Central journal article supplement (PMC2567489)
Supplement: 0807055105_0807055105SI.pdf [file 0807055105_0807055105SI.pdf]

# Supporting Information

Eikesdal et al. 10.1073/pnas.0807055105

## SI Text

### Supporting Materials and Methods

**Cell Lines and *in Vitro* Conditions.** The Lewis lung carcinoma (LLC), SCC-PSA1 teratocarcinoma (SP), human renal clear cell carcinoma (786-O) and bovine pulmonary arterial endothelial cell lines (C-PAE) were obtained from American Type Culture Collection and grown *in vitro*. The cell lines were maintained in DMEM (Life Technologies, Inc.) supplemented with 10% FCS (FCS), 100 units/ml of penicillin, and 100 mg/ml of streptomycin.

***In Vivo* Tumor Trials.** Five- to 6-week-old C57/BL6 and SV129 mice and 8-week-old athymic Nu/Nu mice were purchased from Jackson and Charles River Laboratories respectively. The nude mice were kept in autoclaved cages and given autoclaved water and laboratory rodent chow.

The various treatments commenced when the tumors had reached 4–6 mm in diameter, and the animals were stratified into groups according to tumor size. The tumors were measured every 3–4 days using Vernier calipers, and the volume was calculated using the standard formula ( $\text{width}^2 \times \text{length} \times 3.14/6$ ). Tumor cell and i.v. drug injections were undertaken during isoflurane gas anesthesia. I.v. injections were given through the retrobulbar venous plexus.

For the SP tumor study, tumstatin peptide was resuspended in sterile PBS containing 10% dimethyl sulfoxide (DMSO), and the mice were injected i.v. with 30  $\mu\text{g}/\text{day}$  from day 10 until sacrifice. DMSO was used because tumstatin peptide is poorly soluble in PBS due to a high percentage of hydrophobic amino acids (1). The control group received vehicle alone. From day 25, the tumstatin peptide-treated animals were given either preimmune rabbit serum or a tumstatin peptide-antibody, at a dose of 1,340  $\mu\text{g}/\text{mouse}/\text{day}$ , together with the tumstatin peptide. The rabbit antibody against tumstatin peptide was prepared as previously described (2, 3). Calculated from the molecular weight of whole IgG and tumstatin peptide, the molar ratio of the preimmune serum or tumstatin peptide-antibody to tumstatin peptide was 1.3:1. Assuming that the effective fraction of IgG in the purified IgG is 10%, the ratio was 13:1.

For the LLC tumor study tumstatin peptide and tumstatin peptide mutant were resuspended in sterile PBS containing 10% DMSO, and the mice were injected i.v. twice a day at 5 mg/kg for 18 days. The control group received vehicle alone.

For the 786-O tumor response study the treatment schedules were: sham treatment: PBS 0.1 ml i.v. Mon-Fri and 0.1 ml i.p. Monday and Thursday, FITC-tumstatin peptide: 35  $\mu\text{g}$  i.v. Monday–Friday, and/or bevacizumab (Avastin, Genentech): 100  $\mu\text{g}$  i.p. Monday and Thursday. Treatment was given for a total of 5 weeks.

All animal studies were approved by the Institutional Animal Care and Use Committee of the Beth Israel Deaconess Medical Center and are in accordance with the guidelines of the Department of Health and Human Services.

**Cell Proliferation Assay.** A suspension of C-PAE cells (4,000 cells/well) in DMEM w/ 0.5% FCS was plated onto 96-well plates that had been precoated with fibronectin (10  $\mu\text{g}/\text{ml}$ ). Cells were left to attach overnight, and the following day the medium was removed and replaced with DMEM containing either 0.1% FCS (unstimulated negative control) or 20% FCS, 5 ng/ml vascular endothelial growth factor (VEGF, R&D Systems) and 10 ng/ml of basic fibroblast growth factor (bFGF, R&D). Tumstatin,

tumstatin mutant protein, tumstatin peptide or tumstatin peptide mutants were added to the stimulated cells, and the cells were incubated for 48 h at 37°C. Thereafter the cell number was counted as described previously, using methylene blue staining to ensure that only living cells were included (4).

**Cell Attachment Assays.** The assays were performed as described, with some modifications (5, 6); 96-well plates were coated with tumstatin peptide (50  $\mu\text{g}/\text{ml}$ ) or bovine serum albumine (BSA, 100 mg/ml) for 2 h. C-PAE cells ( $1.5 \times 10^5$  cells/ml in DMEM) were preincubated with 1, 5, 10, or 50  $\mu\text{g}/\text{ml}$  of polyclonal anti-tumstatin peptide or anti-tumstatin antibody or control rabbit IgG (preimmune serum) for 15 min at room temperature. The rabbit antibodies against tumstatin and tumstatin peptide were prepared as previously described (2, 3). The cells were thereafter plated at 100  $\mu\text{l}/\text{well}$  and incubated for 45 min at 37°C to allow cell attachment. Then the medium was removed, and the cells were washed once with warm DMEM, before adding warm DMEM containing 10% FCS and incubating for another 60 min. After a brief wash with warm PBS (PBS, Mediatech), the cells were fixed with 10% formalin in neutral buffered saline (Sigma) for 30 min at room temp. Then the formalin was removed and the cells were stained with 80  $\mu\text{l}/\text{well}$  of 1% methylene blue (Sigma) in 0.01 M borate buffer (pH 8.5) for 30 min. After washing, the methylene blue was extracted with 100  $\mu\text{l}$  of 0.1 N HCl/Ethanol (1:1 mix) for 30 min at room temp. The optical density was thereafter read at a wave length of 655 nm using a Bio-Rad microplate reader to determine the percentage of cells that were attached.

***In Vitro* Binding of Tumstatin Peptide and Dependence on Cell Proliferation Status.** C-PAE cells were grown to 40% or 100% confluency on 8-chamber slides (Lab-Tek). Then FITC-tumstatin peptide (30  $\mu\text{g}/\text{ml}$ ) was added and incubated with the cells for 20 min, before fixation with either acetone (4°C, 5 min) for surface integrin labeling or ethanol/acetic acid (50:50 vol/vol, -20°C, 20 min) for intracellular VE-cadherin staining. Cells were permeabilized with Tris buffered saline (TBS) supplemented with 0.1% Tween 20 and blocked with 1% BSA for 20 min at room temperature. The cells were then incubated with a monoclonal mouse anti-human  $\alpha\text{v}$  integrin subunit (Chemicon) or a polyclonal goat anti-human VE-cadherin (Santa Cruz Biotechnology) primary antibody for 60 min at room temperature. Subsequently, a rhodamine-conjugated donkey anti-mouse or donkey anti-goat IgG secondary antibody (Jackson ImmunoResearch, dilution 1:100) was applied for 60 min at room temperature. Sections were mounted with Vectashield (Vector Laboratories) and analyzed by confocal microscopy.

**Distribution of Tumstatin Peptide in Mice With or Without Endogenous Collagen IV- $\alpha 3$  (Tumstatin Precursor Deficient).** LLC tumors were implanted and grown in collagen IV- $\alpha 3$  (+/-) and collagen IV- $\alpha 3$  (-/-, tumstatin precursor deficient) mice as described previously (7). Ninety minutes before sacrifice 50  $\mu\text{g}/\text{g}$  body weight of BrdU was injected i.v. and 45 min before death FITC-tumstatin peptide 0.5 mg/kg was injected i.v. Tumors and various organs were collected and processed for immunohistochemistry as described below.

**Attachment of Tumstatin Peptide to Neovessels During Normal and Pathological Angiogenesis.** Skin wound healing, liver regeneration and *in vivo* Matrigel plug assays were performed as previously



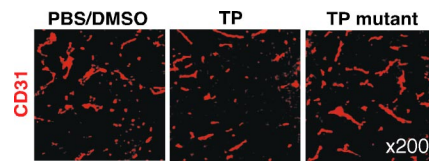

Fig. S1. The effect of tumstatin peptide (TP) and tumstatin peptide mutant on the number of blood vessels in LLC tumors on day 32. Red: anti-CD31.

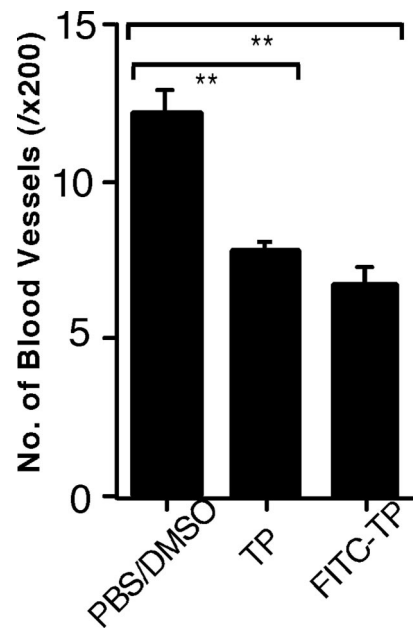

**Fig. S2.** The effect of tumstatin peptide and FITC-tumstatin peptide on the number of blood vessels (per  $\times 200$  high-power field) in LLC tumors on day 32.  $^{**}P < 0.01$  compared to PBS/DMSO.

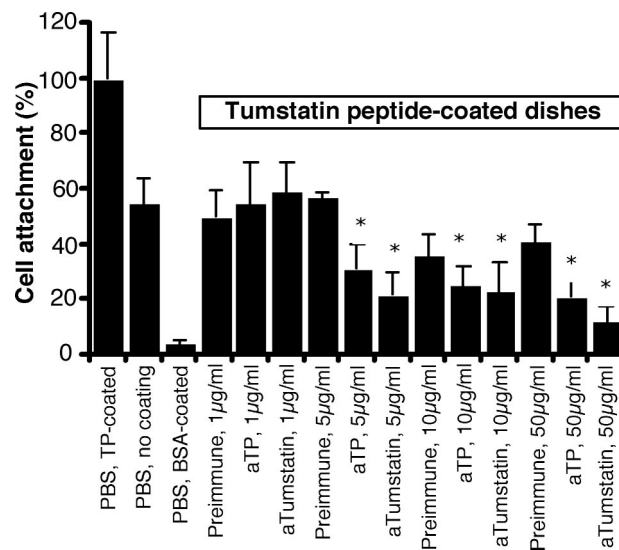

**Fig. S3.** The attachment of C-PAE cells to tumstatin peptide (TP)-coated plates. The cells were preincubated with a preimmune, anti-tumstatin peptide (aTP) or anti-tumstatin (aTumstatin) antibody. Bars: mean  $\pm$  SEM. \*,  $P < 0.05$  compared to preimmune/control antibody of same concentration.

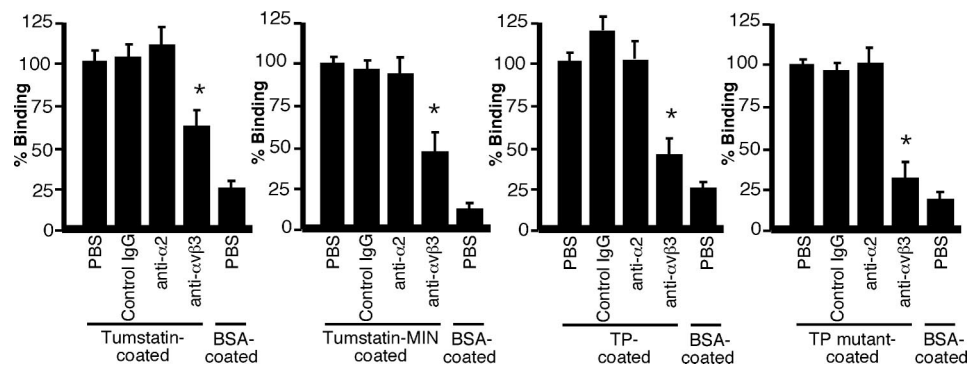

**Fig. S4.** The importance of  $\alpha v\beta 3$  integrin receptor for endothelial cell binding to tumstatin and tumstatin peptide. Plates were coated with tumstatin, tumstatin mutant protein (tumstatin-MIN), tumstatin peptide or tumstatin peptide mutant, and C-PAE cell attachment was assessed. The cells were preincubated with either a control,  $\alpha 2$  integrin subunit or  $\alpha v\beta 3$  integrin-antibody. \*,  $P < 0.05$  compared to control or  $\alpha 2$  antibody.

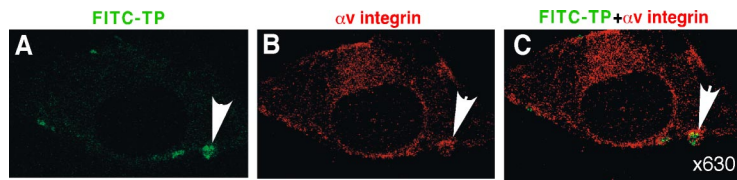

**Fig. S5.** The binding characteristics of tumstatin peptide to the  $\alpha v$  integrin subunit on endothelial cells. FITC-tumstatin peptide binds to the endothelial cell surface via  $\alpha v(\beta 3)$  integrin. Green: FITC-tumstatin peptide (FITC-TP). Red: anti- $\alpha v$  integrin subunit.

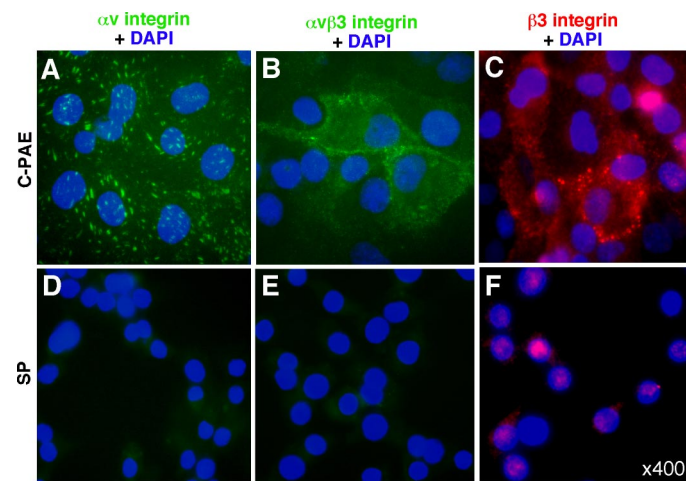

**Fig. S6.** The expression of  $\alpha v \beta 3$  integrin on C-PAE endothelial cells and SP teratocarcinoma cells. Apart from slight nuclear staining of SP nuclei for the  $\beta 3$  integrin subunit, there was positive immunostaining only on the endothelial cells. Green/red: integrin. Blue: DAPI.

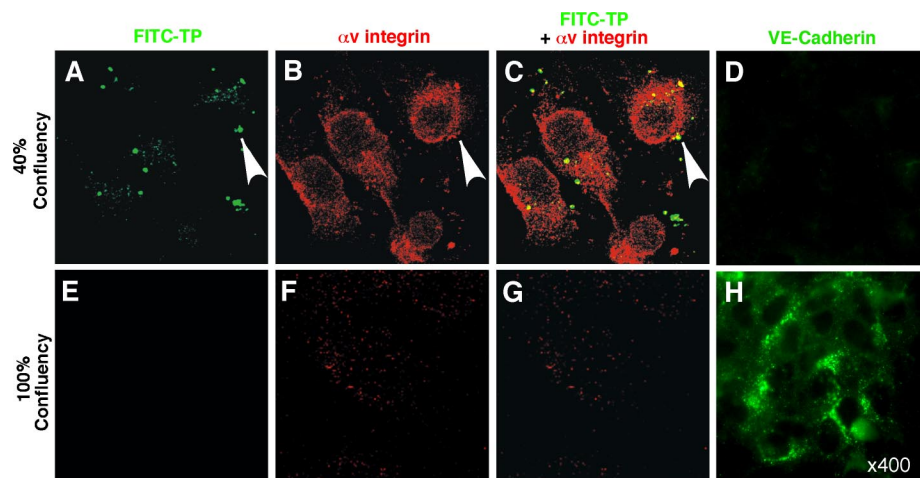

**Fig. S7.** (A–H) The importance of cell proliferation status for tumstatin peptide binding. VE-cadherin staining was used to demonstrate the confluency state of the cells. As expected VE-cadherin expression was low when the cells were non-confluent, whereas it was strongly up-regulated at confluency. Green: FITC-tumstatin peptide (FITC-TP). Red: anti- $\alpha_v$  integrin subunit or VE-cadherin. Confocal microscopy.

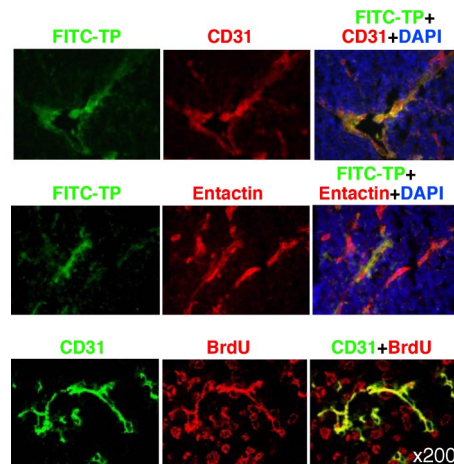

**Fig. 58.** Specific binding of FITC-tumstatin peptide to CD31<sup>+</sup> and entactin<sup>+</sup> blood vessels in LLC tumors, and the BrdU<sup>+</sup> proliferative status of the tumor endothelium.

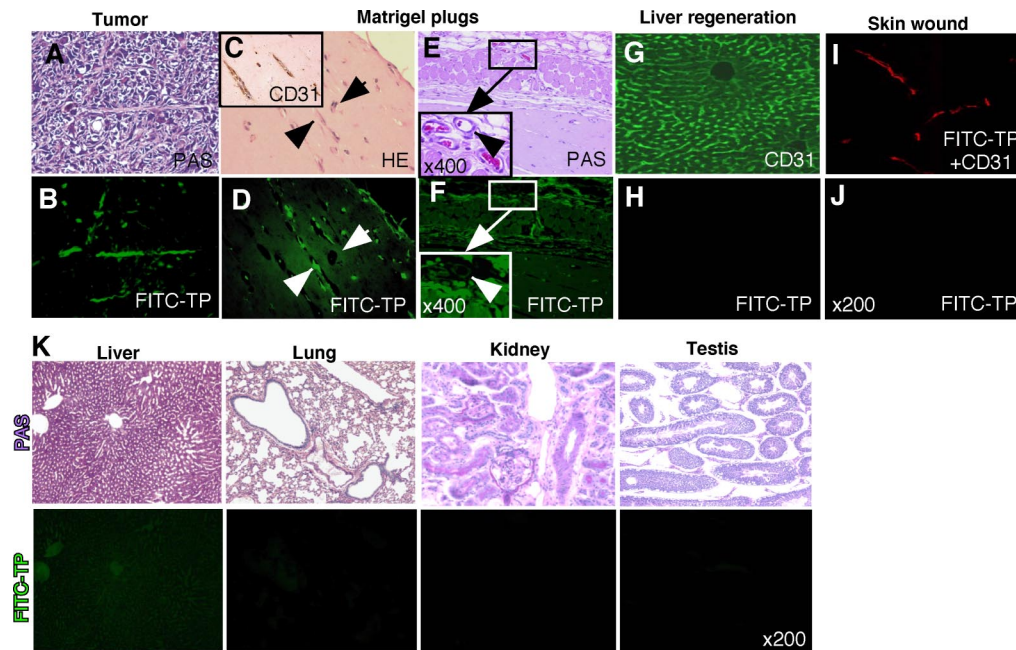

**Fig. S9.** Binding of FITC-tumstatin peptide (FITC-TP) to blood vessels during pathological and physiological, repair-associated angiogenesis. (A–F) FITC-tumstatin peptide binds to malignant (LLC tumor, A and B) and nonmalignant, pathological neovessels (Matrigel plugs, C–F). Arrowhead (C and D): FITC-tumstatin peptide binding to neovessels in the Matrigel. Arrow (C and D): Some blood vessels were not labeled by FITC-tumstatin peptide. (C Inset) CD31 vessel staining (brown, diaminobenzidine tetrahydrochloride). Arrowhead (E and F Inset): FITC-tumstatin peptide was not incorporated in the normal blood vessels around the Matrigel plug. (G–J) Lack of binding of FITC-tumstatin peptide to blood vessels during normal angiogenesis, in regenerating liver after 70% liver removal (G and H) and in a skin wound (I and J). In the liver regeneration experiment, images for CD31-staining (green) and FITC-tumstatin peptide (green) binding are from consecutive sections. (K) Lack of binding of FITC-tumstatin peptide to blood vessels in normal tissues.

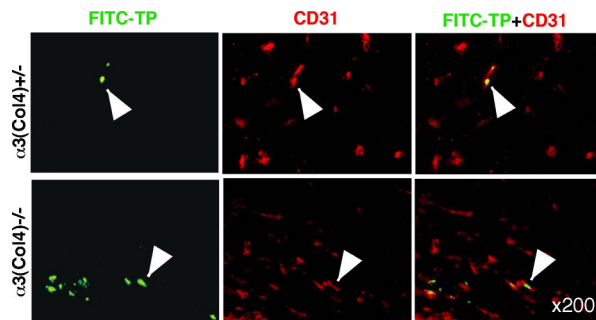

**Fig. S10.** FITC-tumstatin peptide binding to LLC tumor blood vessels was compared between collagen IV- $\alpha 3$  ( $-/-$ , tumstatin precursor deficient) and  $\alpha 3$  ( $+/-$ ) mice. Arrowheads: binding of FITC-tumstatin peptide to blood vessels.

**Table S1. Endogenous angiogenesis inhibitors and their endothelial integrin receptors**

| Integrin          | Ligand (ref.)                           |
|-------------------|-----------------------------------------|
| $\alpha 1\beta 1$ | Arresten (1)                            |
| $\alpha 2\beta 1$ | Endorepellin (2)                        |
| $\alpha 5\beta 1$ | Endostatin (3)                          |
| $\alpha v\beta 3$ | Tumstatin, canstatin, angiostatin (4–6) |
| $\alpha v\beta 5$ | Canstatin (5)                           |

1. Sudhakar A, et al. (2005) Human alpha1 type IV collagen NC1 domain exhibits distinct antiangiogenic activity mediated by alpha1beta1 integrin. *J Clin Invest* 115: 2801–2810.
2. Bix G, et al. (2006) Endorepellin in vivo: targeting the tumor vasculature and retarding cancer growth and metabolism. *J Natl Cancer Inst* 98: 1634–1646.
3. Wickstrom SA, Alitalo K, Keski-Oja J (2002) Endostatin associates with integrin alpha5beta1 and caveolin-1, and activates Src via a tyrosyl phosphatase-dependent pathway in human endothelial cells. *Cancer Res* 62: 5580–5589.
4. Maeshima Y, Colorado PC, Kalluri R (2000) Two RGD-independent alpha vbeta 3 integrin binding sites on tumstatin regulate distinct anti-tumor properties. *J Biol Chem* 275: 23745–23750.
5. Magnon C, et al. (2005) Canstatin acts on endothelial and tumor cells via mitochondrial damage initiated through interaction with alphavbeta3 and alphavbeta5 integrins. *Cancer Res* 65: 4353–4361.
6. Tarui T, Miles LA, Takada Y (2001) Specific interaction of angiostatin with integrin alpha(v)beta(3) in endothelial cells. *J Biol Chem* 276: 39562–39568.
